# Supplementary material for: Synergistic interplay of Zn and Rh-Cr promoters on Ga2O3based photocatalysts for water splitting
Source: Royal Society of Chemistry journal article supplement (doi:10.1039/c8cp03987a), 2018-01-01
Supplement: c8cp03987a1.pdf [file c8cp03987a1.pdf]

## Supporting Information

# **Synergistic interplay of Zn and Rh-Cr promoters on Ga<sub>2</sub>O<sub>3</sub> based photocatalyst for water splitting**

Marta Borges Ordoño<sup>a</sup>, Shunsaku Yasumura<sup>a</sup>, Pieter Glatzel<sup>b</sup>,

and Atsushi Urakawa<sup>\*a</sup>

<sup>a</sup>*Institute of Chemical Research of Catalonia (ICIQ), The Barcelona Institute of Science and  
Technology, Tarragona, 43007, Spain*

<sup>b</sup>*ESRF - The European Synchrotron, Grenoble, 38043, France*

*\*E-mail: aurakawa@iciq.es*

## MATERIALS CHARACTERIZATION

UV-Vis DRS measurements were performed on a Shimadzu UV-2401PC spectrophotometer with D<sub>2</sub> and W lamps as light sources, and a photomultiplier detector. Solid samples were introduced in a round holder with a fused silica window on an integrating sphere attachment ISR-240A from Shimadzu. BaSO<sub>4</sub> was used as internal standard and spectra were collected between 240 and 800 nm. Band gap ( $E_g$ ) was calculated from the slope intersection of the normalized Kubelka-Munk absorption spectrum.

Scanning transmission electron microscopy (STEM) was measured in annular dark-field imaging mode (HAADF) in a high-resolution FEI Tecnai F20 STEM microscope at ICN2 (Barcelona). Chemical analysis and chemical mapping were performed by energy dispersive X-ray spectroscopy (EDX) and electron energy loss spectroscopy (EELS), respectively. 4 wt% Zn-Ga<sub>2</sub>O<sub>3</sub> and Rh-Cr/4wt% Zn-Ga<sub>2</sub>O<sub>3</sub> materials prepared in ethanol solution and were deposited on the a TEM support grid.

Cr and Rh elements were studied at their corresponding K-edge energies 5.99 and 23.22 keV, respectively. HERFD-XANES were measured from 5.98 to 6.08 keV (Cr) and 23.18 to 23.40 keV (Rh); with a step size for Cr of 0.1 eV and 0.05 eV for Rh. The spectrometer was equipped with four spherical Ge (333) crystal for Cr, and a diode IF3 with Cu+Ni filter was used for Rh detection. All the samples and reference materials were measured ex situ in the form of pellet (13 mm diameter), containing 60 mg of material and 60 mg of cellulose.

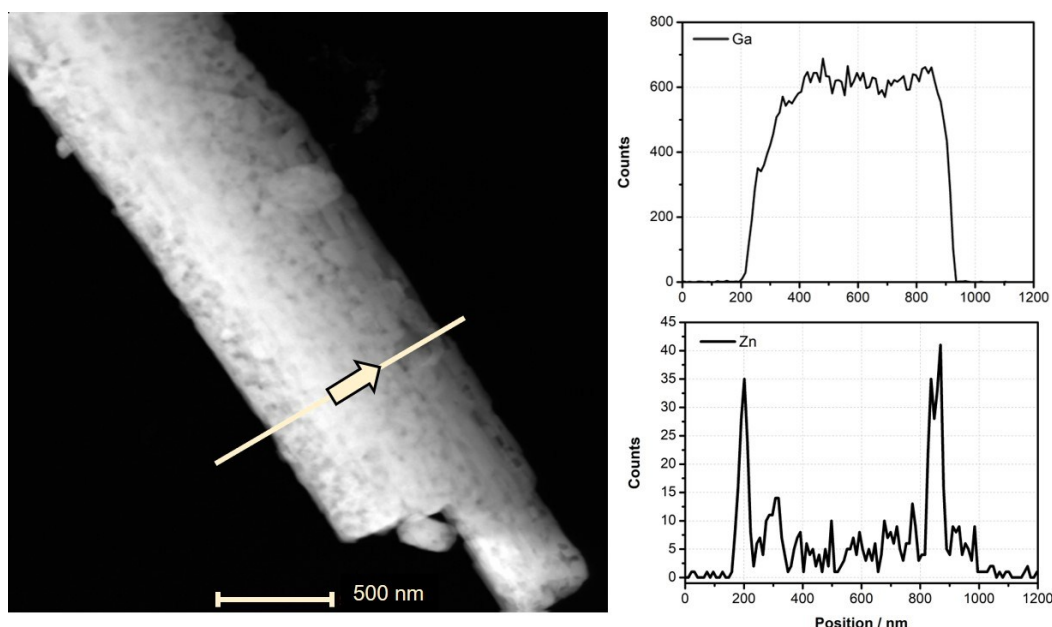

**Fig. S1** (left) STEM-HAADF image of 4 wt% Zn-Ga<sub>2</sub>O<sub>3</sub> material, with the transversal line indicating where EDX was measured. (right) Elemental profiles of Ga (top) and Zn (bottom) along the transversal line.

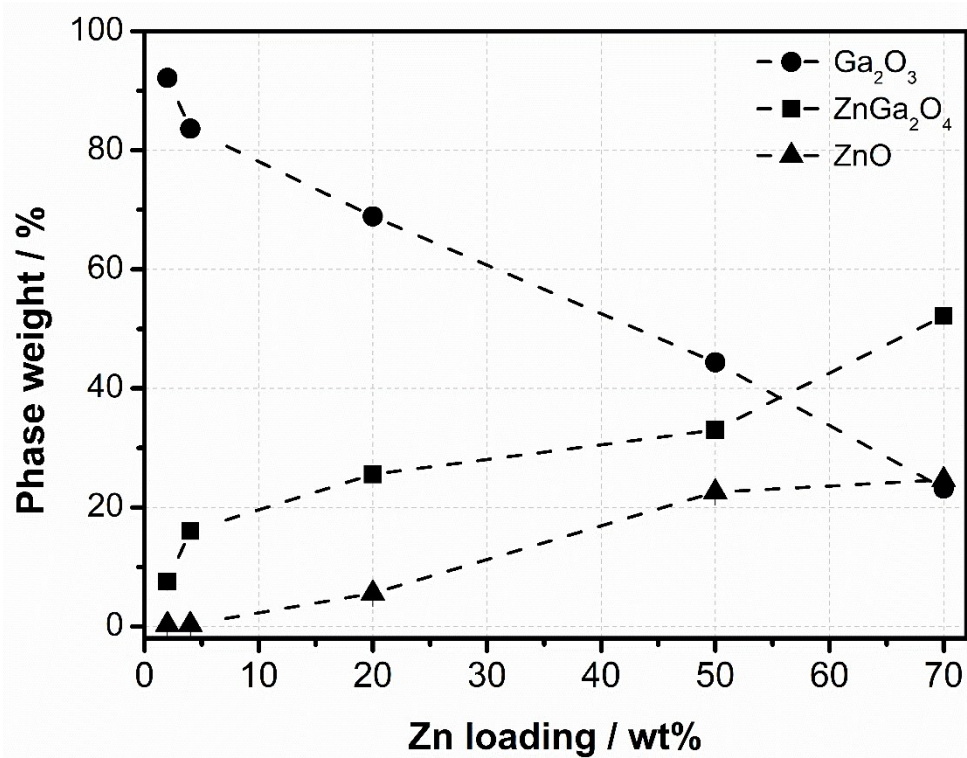

**Fig. S2** Quantitative phase analysis of the XRD data for xZn-modified Ga<sub>2</sub>O<sub>3</sub> photocatalysts where x= 2, 4, 20, 50, and 70 wt% of Zn.

**Table. S1** Relative shift calculated from K $\beta$  lines using the center of mass for Zn-Kedge (top) and Ga-Kedge (bottom).

| Sample                                   | K $\beta$ | Center of mass (eV) | Relative shift (eV) |
|------------------------------------------|-----------|---------------------|---------------------|
| ZnO                                      | 1         | 9571.863            | 0                   |
|                                          | 2         | 9571.863            |                     |
| ZnGa <sub>2</sub> O <sub>4</sub>         | 1         | 9571.832            | 0                   |
|                                          | 2         | 9571.832            |                     |
| 2 wt% Zn-Ga <sub>2</sub> O <sub>3</sub>  | 1         | 9571.842            | 0.002               |
|                                          | 2         | 9571.844            |                     |
| 4 wt% Zn-Ga <sub>2</sub> O <sub>3</sub>  | 1         | 9571.842            | 0                   |
|                                          | 2         | 9571.842            |                     |
| 20 wt% Zn-Ga <sub>2</sub> O <sub>3</sub> | 1         | 9571.855            | 0.003               |
|                                          | 2         | 9571.852            |                     |
| 50 wt% Zn-Ga <sub>2</sub> O <sub>3</sub> | 1         | 9571.854            | 0.005               |
|                                          | 2         | 9571.859            |                     |
| 70 wt% Zn-Ga <sub>2</sub> O <sub>3</sub> | 1         | 9571.853            | 0.001               |
|                                          | 2         | 9571.854            |                     |

| Sample                                   | K $\beta$ | Center of mass (eV) | Relative shift (eV) |
|------------------------------------------|-----------|---------------------|---------------------|
| Ga <sub>2</sub> O <sub>3</sub>           | 1         | 10264.09            | 0                   |
|                                          | 2         | 10264.09            |                     |
| ZnGa <sub>2</sub> O <sub>4</sub>         | 1         | 10264.07            | 0                   |
|                                          | 2         | 10264.07            |                     |
| 2 wt% Zn-Ga <sub>2</sub> O <sub>3</sub>  | 1         | 10264.11            | 0.01                |
|                                          | 2         | 10264.12            |                     |
| 4 wt% Zn-Ga <sub>2</sub> O <sub>3</sub>  | 1         | 10264.11            | 0                   |
|                                          | 2         | 10264.11            |                     |
| 20 wt% Zn-Ga <sub>2</sub> O <sub>3</sub> | 1         | 10264.13            | 0                   |
|                                          | 2         | 10264.13            |                     |
| 50 wt% Zn-Ga <sub>2</sub> O <sub>3</sub> | 1         | 10264.12            | 0.01                |
|                                          | 2         | 10264.13            |                     |
| 70 wt% Zn-Ga <sub>2</sub> O <sub>3</sub> | 1         | 10264.06            | 0                   |
|                                          | 2         | 10264.06            |                     |

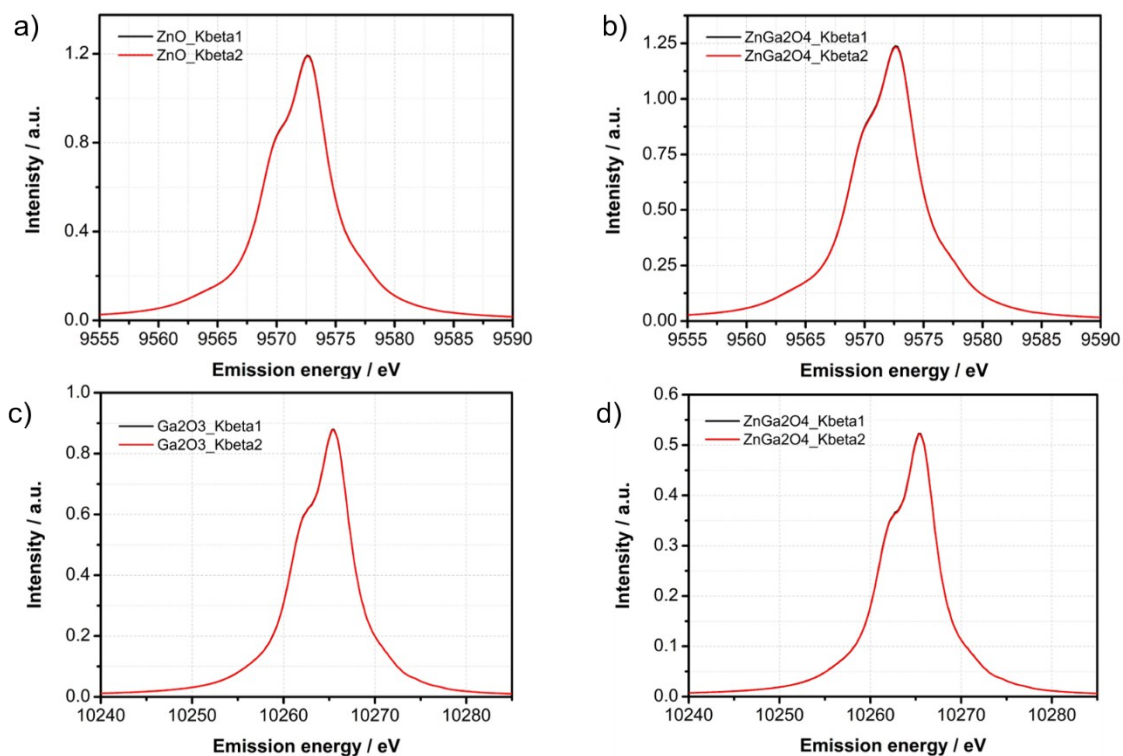

**Fig. S3** Comparison of successive scans of K $\beta$  main line for Zn K-edge a) ZnO and b) ZnGa<sub>2</sub>O<sub>4</sub> and Ga K-edge c) Ga<sub>2</sub>O<sub>3</sub> and d) ZnGa<sub>2</sub>O<sub>4</sub>.

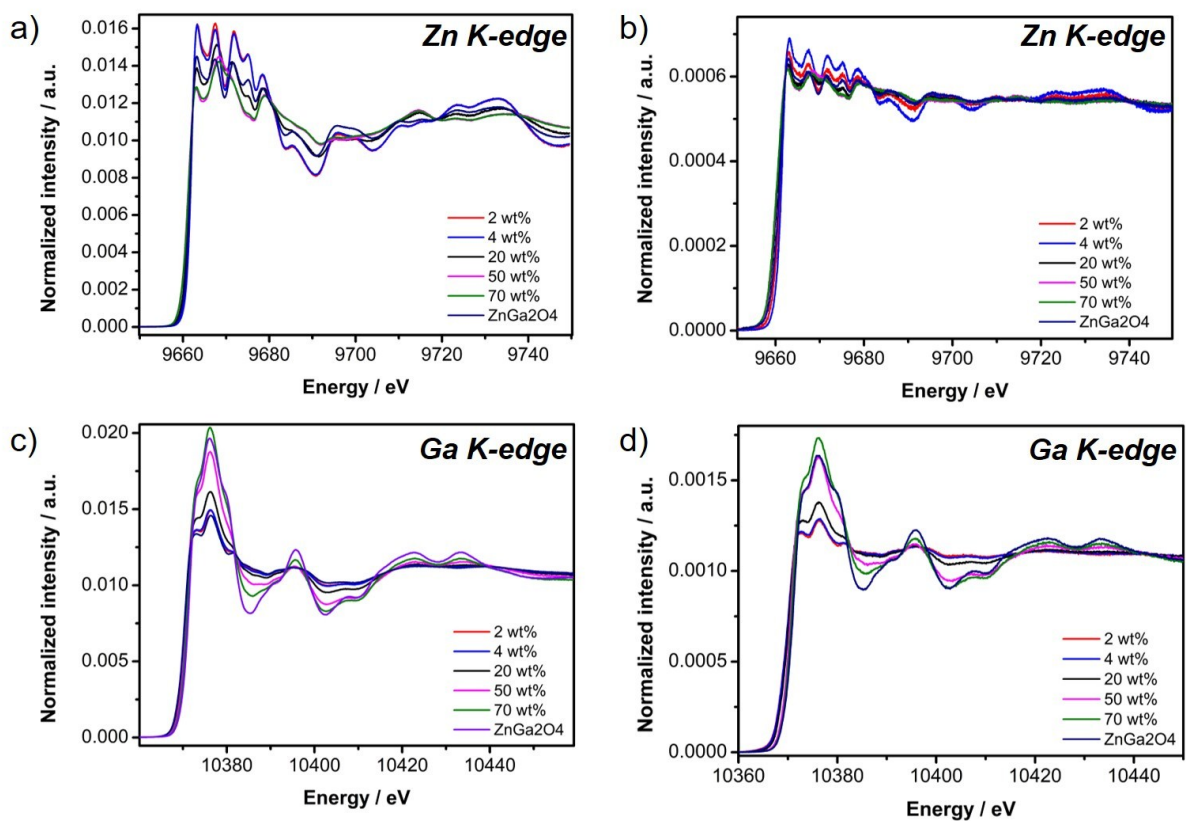

**Fig. S4** XANES for Zn K-edge and Ga K-edge comparing HERFD scans (a and c) with total fluorescence scans (b and d).

The performance of density functionals PBE and PBE0 was compared, but due to the high computational cost of PBE0, PBE was applied to perform the cell optimization of the ZnO, Ga<sub>2</sub>O<sub>3</sub>, and ZnGa<sub>2</sub>O<sub>4</sub> structures. First, the atomic positions in the corresponding cells and lattice parameters were optimized using PBE. After this, the energy calculations were performed by PBE0 to obtain more accurate DOS with the atomic positions and lattice parameters calculated above.

**Table S2.** DOS calculations details

|                                        |               |                                |                                  |
|----------------------------------------|---------------|--------------------------------|----------------------------------|
| <b>Package</b>                         |               |                                |                                  |
|                                        | <b>CASTEP</b> |                                |                                  |
| <b>Conditions of Cell optimization</b> |               |                                |                                  |
|                                        | ZnO           | Ga <sub>2</sub> O <sub>3</sub> | ZnGa <sub>2</sub> O <sub>4</sub> |
| <b>Functional</b>                      | PBE           | PBE                            | PBE                              |
| <b>Energy tolerance (eV/atom)</b>      | 1.00E-05      | 1.00E-05                       | 1.00E-05                         |
| <b>Max. force(eV/Å)</b>                | 0.03          | 0.03                           | 0.03                             |
| <b>Max. stress (Gpa)</b>               | 0.05          | 0.05                           | 0.05                             |
| <b>Max. displacement (Å)</b>           | 0.001         | 0.001                          | 0.001                            |
| <b>Energy cutoff (eV)</b>              | 750           | 800                            | 800                              |
| <b>K-mesh</b>                          | 5x5x4         | 5x5x2                          | 3x3x3                            |
| <b>SCF tolerance (eV/atom)</b>         | 1.00E-06      | 1.00E-06                       | 1.00E-06                         |
|                                        |               |                                |                                  |
| <b>Conditions of SCF by PBE0</b>       |               |                                |                                  |
|                                        | ZnO           | Ga <sub>2</sub> O <sub>3</sub> | ZnGa <sub>2</sub> O <sub>4</sub> |
| <b>Functional</b>                      | PBE0          | PBE0                           | PBE0                             |
| <b>Energy cutoff (eV)</b>              | 600           | 600                            | 600                              |
| <b>K-mesh</b>                          | 4x4x2         | 4x4x2                          | 3x3x3                            |
| <b>SCF tolerance (eV/atom)</b>         | 2.00E-06      | 2.00E-06                       | 2.00E-06                         |

The coverage or phase transformation of ZnGa<sub>2</sub>O<sub>4</sub> into ZnO could be further determined by looking deeper into the Zn K-edge VtC-XES region. Typically, VtC spectra has two lines corresponding to  $K\beta_{2,5}$  (located below the Fermi level) and  $K\beta''$  (cross over) at lower fluorescence energy.<sup>1</sup> At low Zn concentrations (2 and 4 wt%) the  $K\beta''$  line was split because of the interaction from the metal (Zn) with s orbitals of O and d orbitals of Ga (**Fig. S5**), this result was supported by the density of states calculations on the reference materials (details of calculation shown in **Table S2**). On the contrary, at high Zn loadings where ZnO phase was detected the  $K\beta''$  line only contains the contribution of s orbitals from O, indicating that first coordination shell of Zn atoms does not contain Ga atoms which might be attributed to the reduced accessibility of Zn atoms to the Ga<sub>2</sub>O<sub>3</sub> surface, in agreement with the EXAFS analysis (**Fig. S6**). In addition, the third emission line due to multielectron transitions (ME) from the emitted and absorbed photoelectrons is observed in the Zn K-edge VtC spectra (**Fig. S5**). The intensity of this ME region is located above the Zn absorption edge energy and decreases with

ZnO formation following the same trend that the photocatalytic activity results. However, correlation with the catalytic results are not discussed here because of the self-absorption effects that could also contribute to the ME intensity.<sup>2,3</sup>

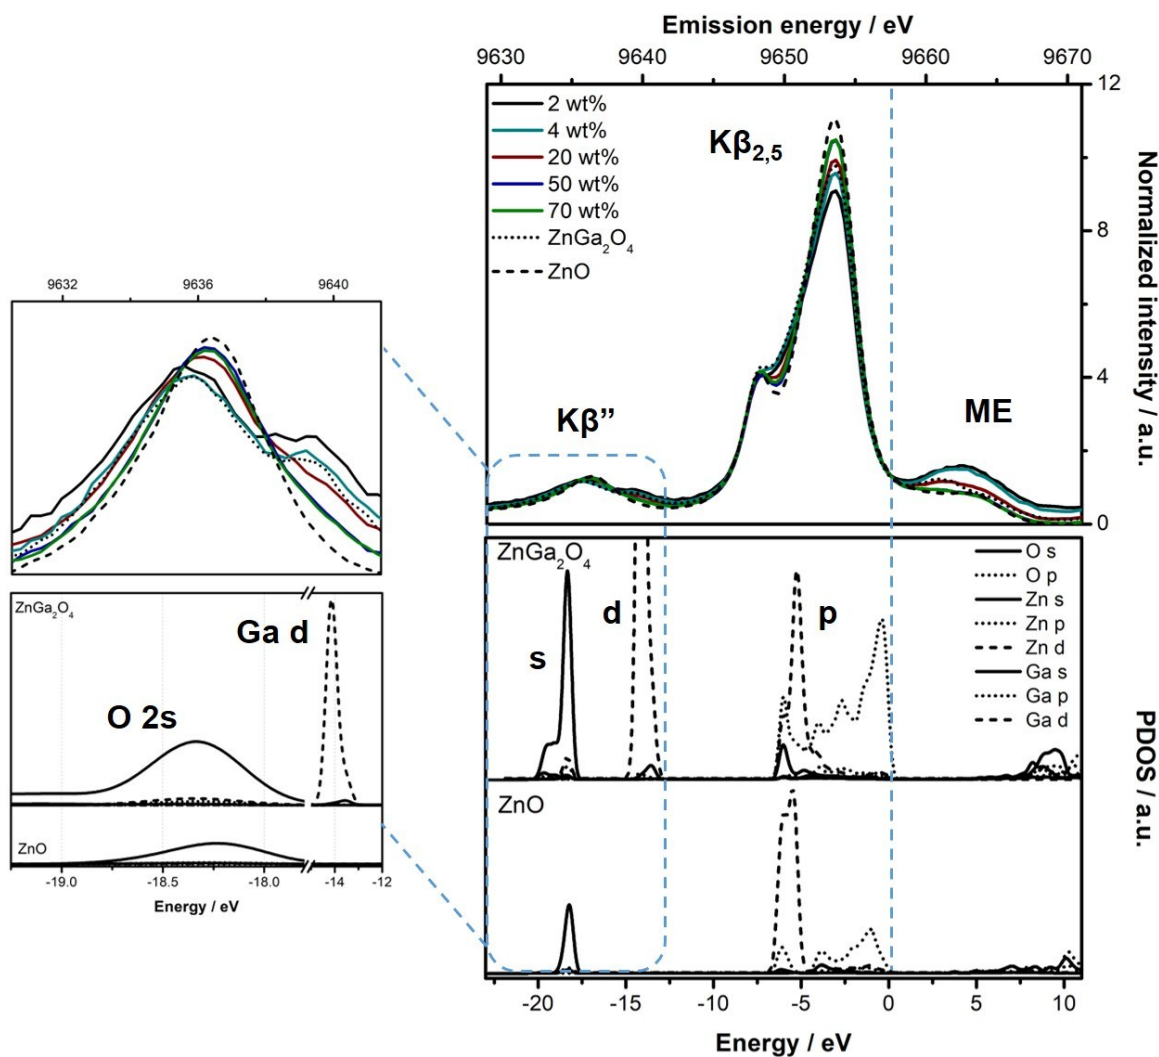

**Fig. S5** Zn K-edge VtC-XES with normalized intensity to the spectral area (top). PDOS calculations for O, Ga, and Zn where mainly s and p regions correspond to the Kβ'' and Kβ<sub>2,5</sub> lines, respectively. The dashed blue line indicates the Fermi level, and the zoomed region corresponds to Kβ''.

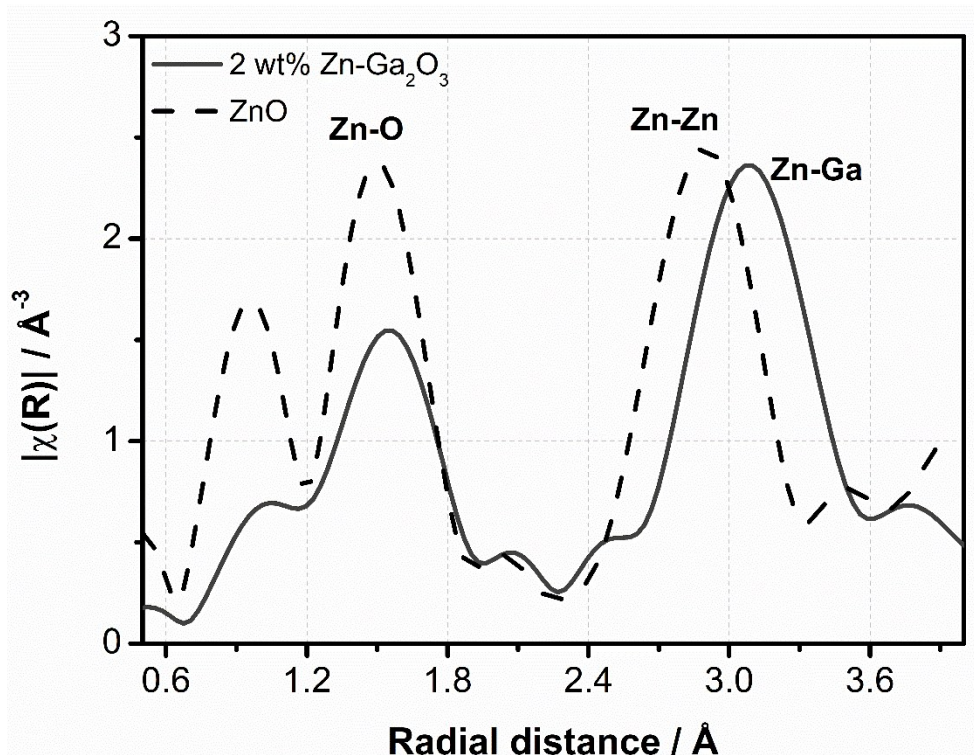

**Fig. S6** EXAFS analysis of low Zn content  $\text{Ga}_2\text{O}_3$  (2 wt%) compared to ZnO (dotted line) reference material. Self-absorption correction was performed on the ZnO EXAFS data by using the Fluo algorithm (Haskel, 1999).

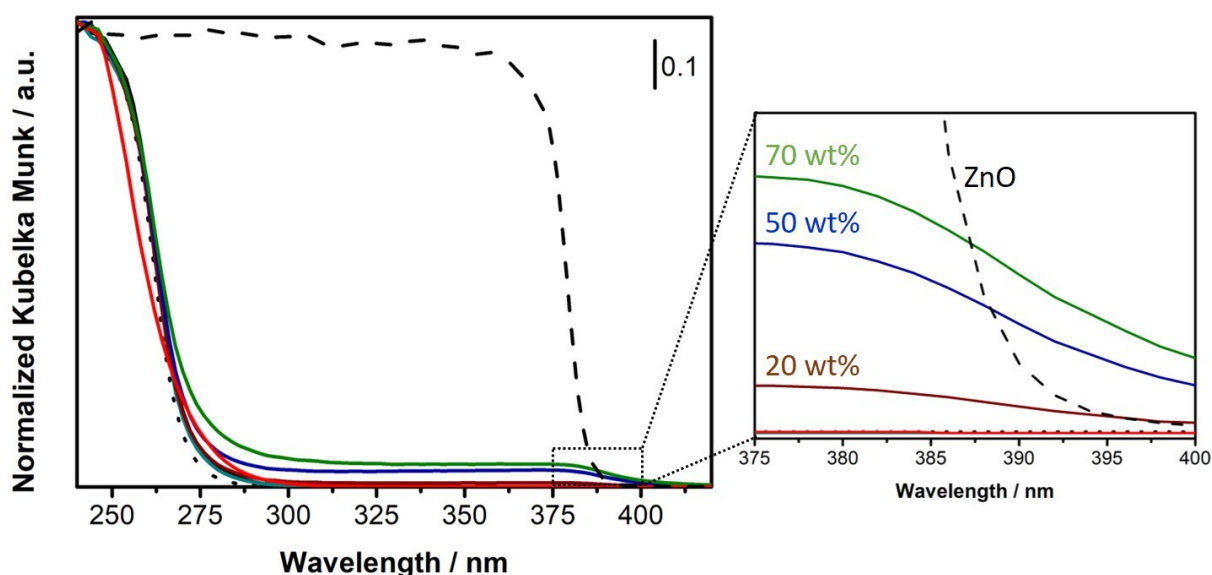

**Fig. S7** UV-Vis DR spectra of  $x\text{Zn-Ga}_2\text{O}_3$  materials with  $x = 2$  (black), 4 (cyan), 20 (maroon), 50 (blue) and 70 (green) and of reference materials,  $\text{ZnGa}_2\text{O}_4$  (red),  $\text{Ga}_2\text{O}_3$  (dotted line) and ZnO (dashed line). Spectra are shown in normalized Kubelka-Munk absorbance unit and the bandgaps were calculated from the slope of the adsorption spectra. Zoomed plot shows the region highlighting light absorption by ZnO.



For both Zn K-edge (**Fig. S8a**) and at Ga K-edge (**Fig. S8b**), opposite trends are observed for the unoccupied energy levels at the Zn and Ga absorption edges (inset plots, **Fig. S8**). For the Zn K-edge, at small Zn concentrations (2 and 4 wt%) the lowest-unoccupied electronic states appear to be comparable to those of  $\text{ZnGa}_2\text{O}_4$  (**Fig. S8a**), while at increasing Zn-loading where ZnO phase is more prominent, the absorption edges shift to lower energies, corresponding to smaller valence-conduction band gaps. This agrees with the UV-Vis DRS study (**Fig. S7**), at high Zn loading ( $\geq 20$  wt%) a weak absorption extending in the visible region appears clearly due to the presence of ZnO, with the optical bandgap of 3.0-3.1 eV.

In contrast, the lowest-unoccupied energy states of Ga are shifted toward higher energies at higher Zn content, pure  $\text{ZnGa}_2\text{O}_4$  shows the highest lowest-unoccupied energy state (**Fig. S8b**). The small shift of the unoccupied energy states of Ga at low Zn concentrations (e.g. energy difference between  $\text{Ga}_2\text{O}_3$  and 4 wt% Zn- $\text{Ga}_2\text{O}_3$  is 0.06 eV) is likely attributed to the minor contribution of  $\text{ZnGa}_2\text{O}_4$  phase for such Zn loadings.

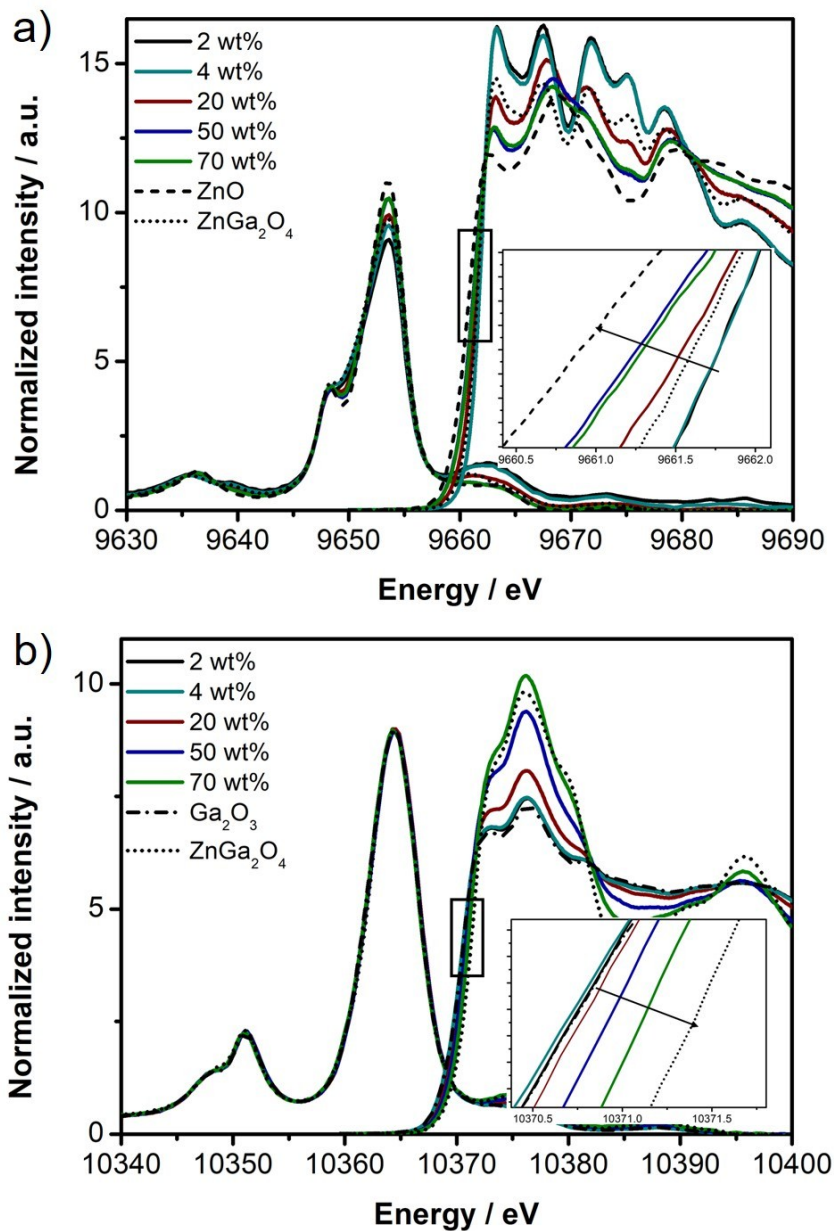

**Fig. S8** XAS and VtC-XES spectra for a) Zn K-edge and b) Ga K-edge. Pure ZnGa<sub>2</sub>O<sub>4</sub> (dotted line), ZnO (dashed line), and Ga<sub>2</sub>O<sub>3</sub> (dot-dashed line). Spectral intensity was normalized to the spectral area. Inset figures show the opposite energy changes of the absorption edge.

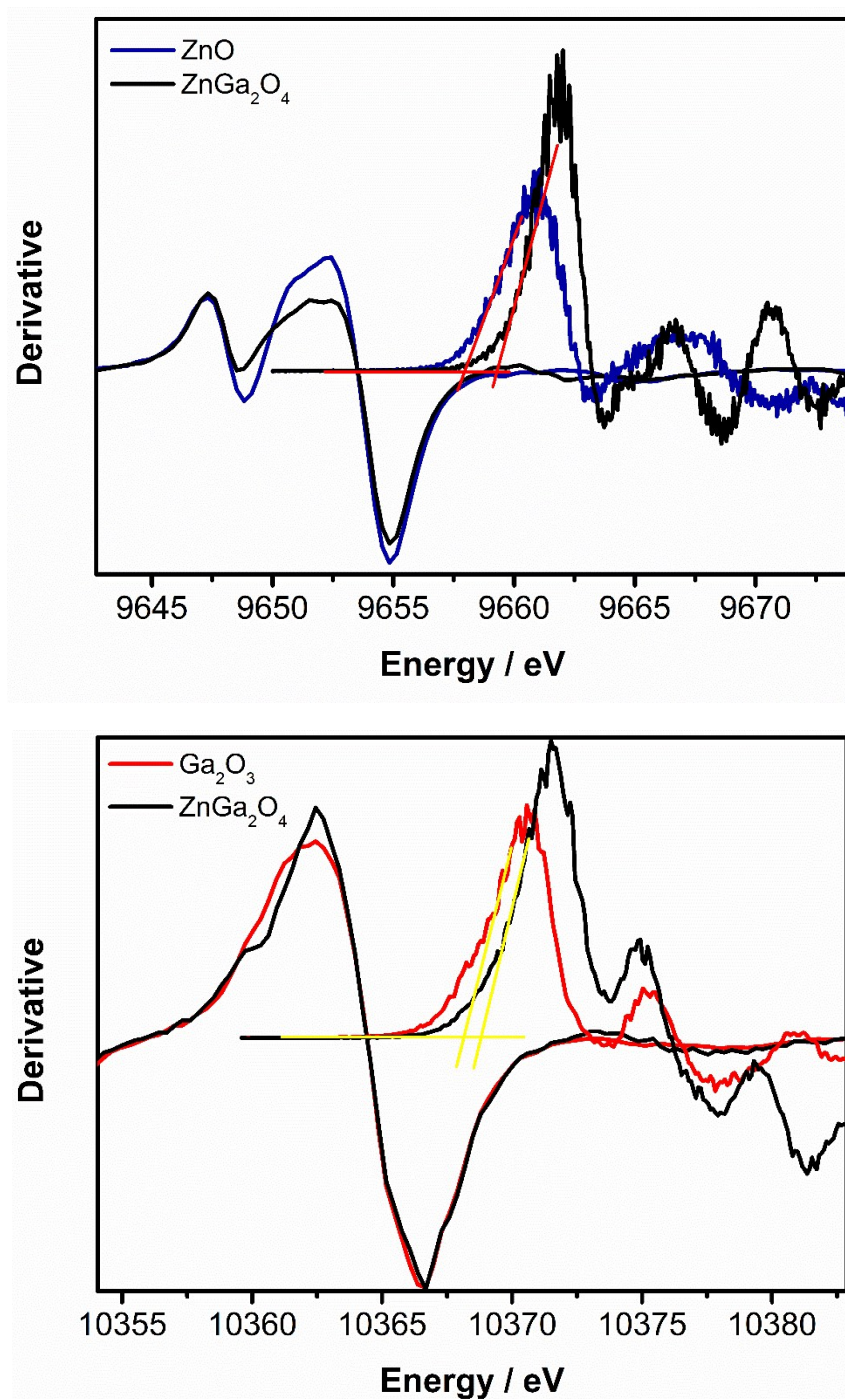

**Fig. S9** First derivative of XAS and VtC-XES spectra for Zn K-edge (top) and Ga K-edge (bottom). Red and yellow lines are positioned at the intersection between baseline at 0 intensity and the slope of the first derivative of XAS, and the intersection from the baseline for XAS and XES was used to calculate the difference between the XAS and XES spectra.

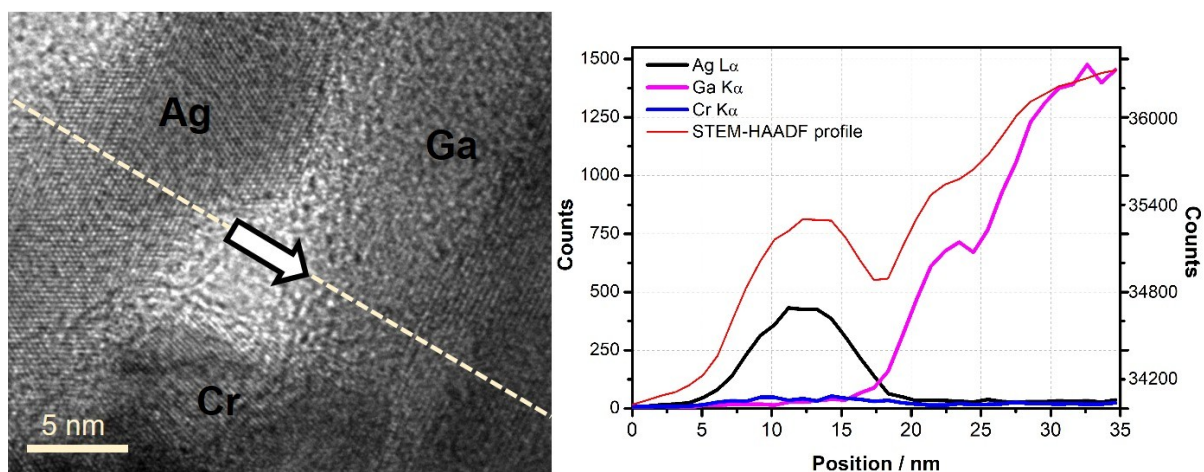

**Fig. S10** STEM-HAADF image of Rh-Cr/4 wt% Zn-Ga<sub>2</sub>O<sub>3</sub>, and elemental profiles over the diagonal for Ag (black), Cr (blue), and Ga (pink). Rh was not detected likely due to its low content.

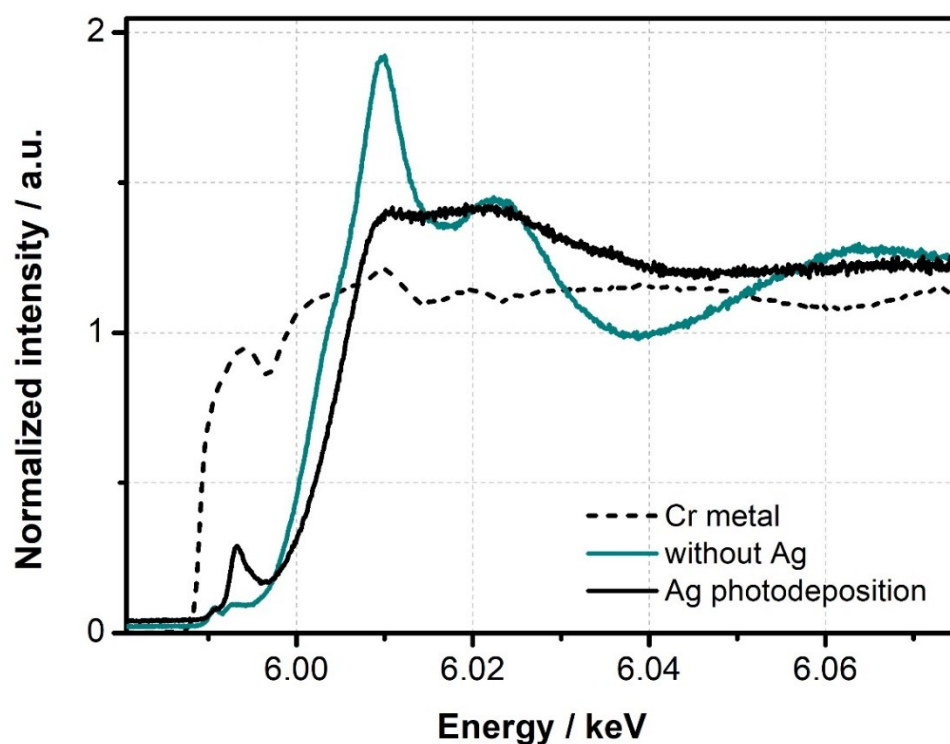

**Fig. S11** XANES spectra at Cr K-edge; Cr metal (dashed line), Rh-Cr/4 wt% Zn-Ga<sub>2</sub>O<sub>3</sub> (cyan), and after silver photodeposition (black).

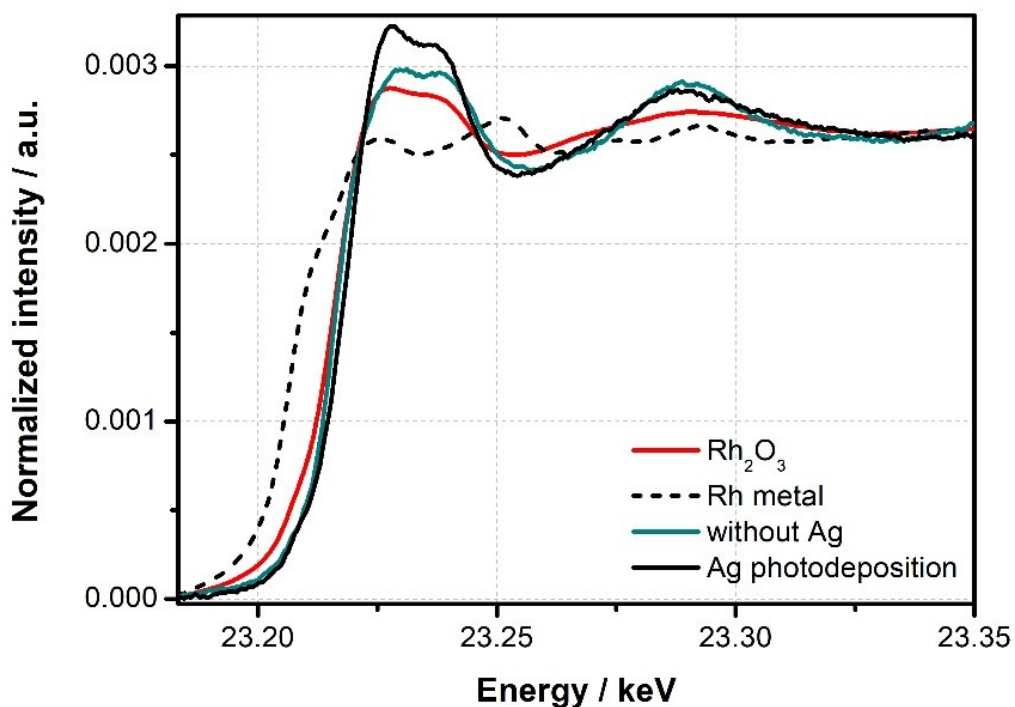

**Fig. S12** XANES spectra at Rh K-edge; Rh-Cr/4 wt% Zn-Ga<sub>2</sub>O<sub>3</sub> (cyan), and after silver photodeposition (black). Rh<sub>2</sub>O<sub>3</sub> (red) and metallic Rh (dashed lines) were used as reference materials.

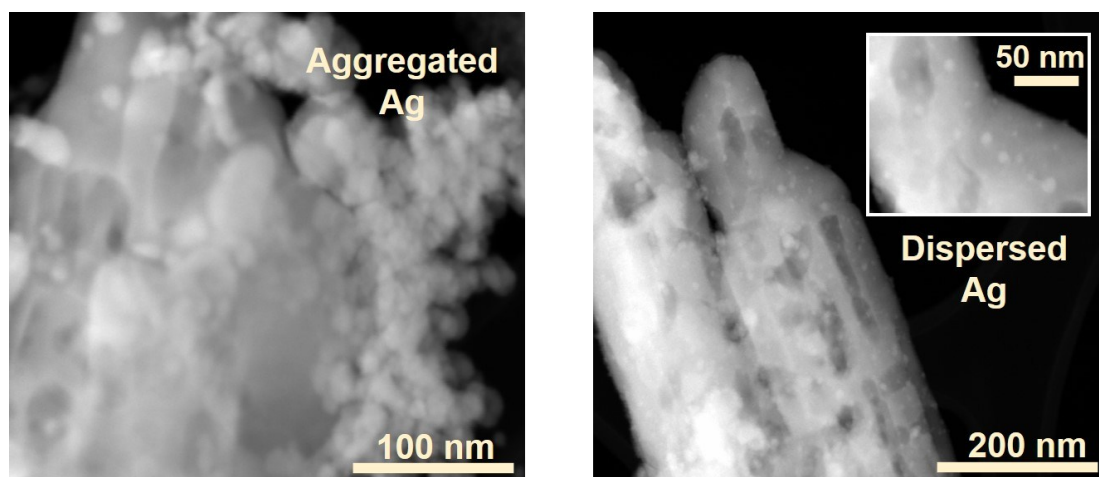

**Fig. S13** STEM-HAADF images of 20 wt% Ag deposited on Rh-Cr/4wt% Zn-Ga<sub>2</sub>O<sub>3</sub> after photodeposition (left) and after impregnation (right).

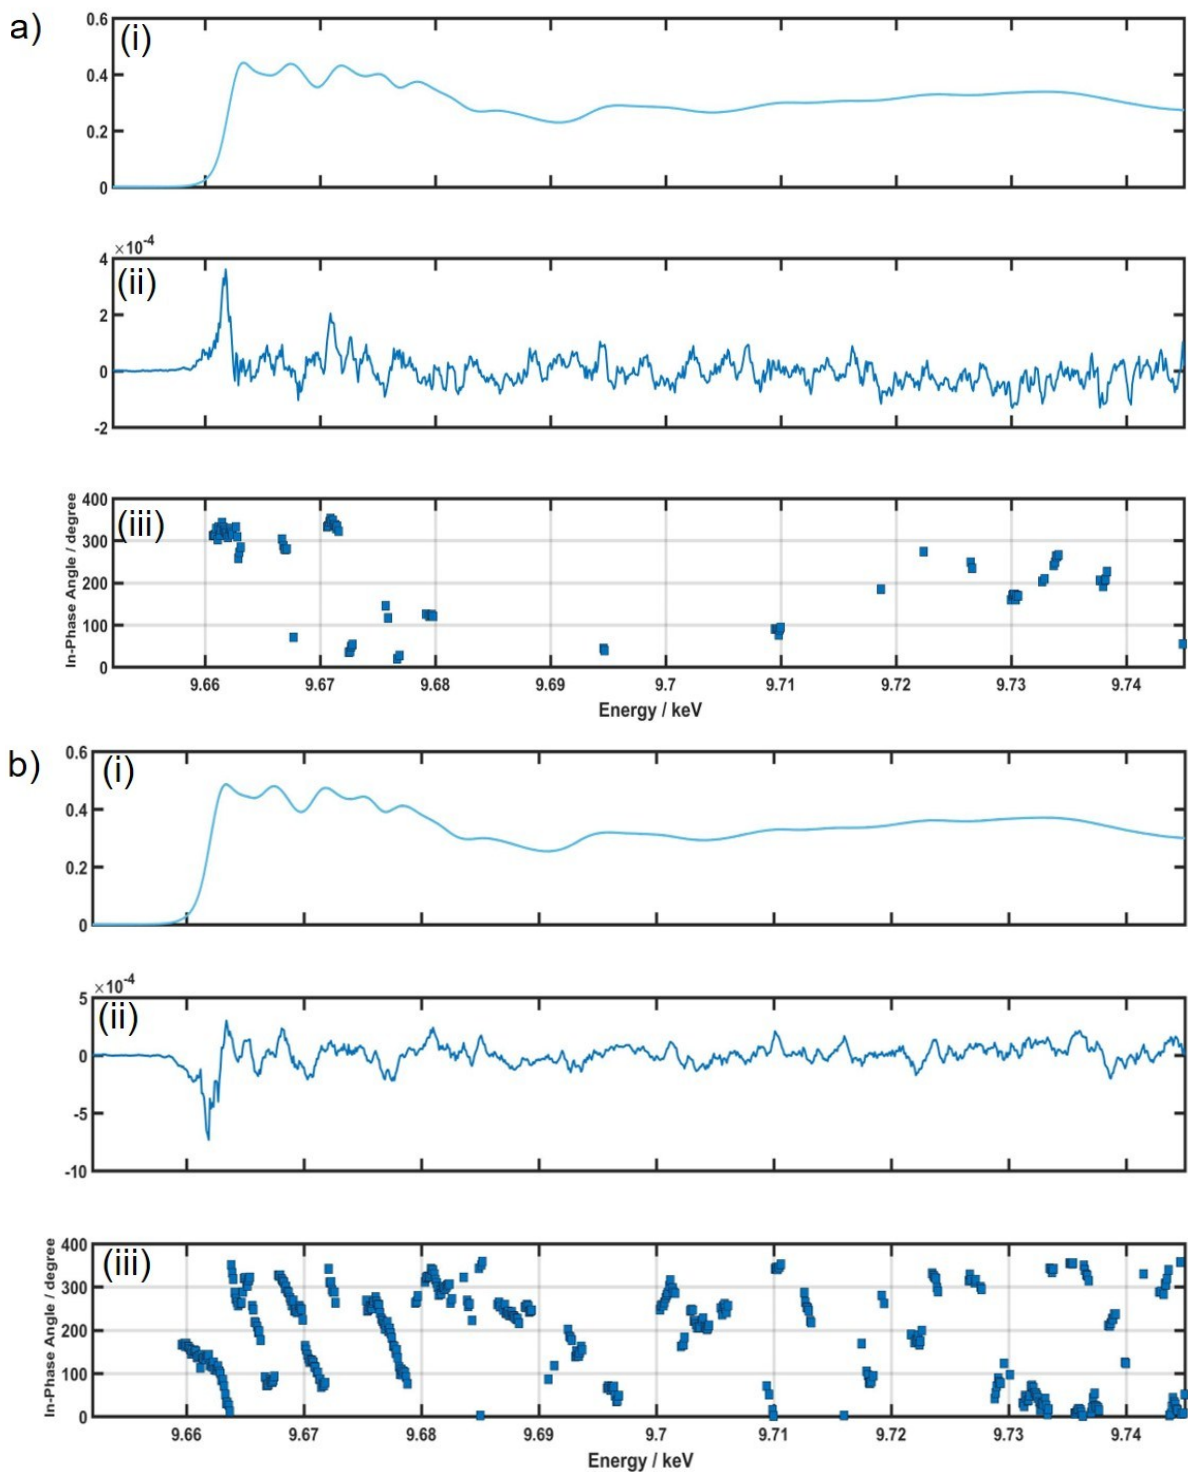

**Fig. S14** Zn-Kedge HERDF-XANES phase-domain spectra and in-phase angles analysis for a) 4wt% Zn-Ga<sub>2</sub>O<sub>3</sub> and b) Rh-Cr/4wt% Zn-Ga<sub>2</sub>O<sub>3</sub>. The amplitude threshold to plot the in-phase angles was 0.0001.

## References

1. U. Bergmann, C. R. Horne, T. J. Collins, J. M. Workman and S. P. Cramer, *Chem. Phys. Lett.*, 1999, **302**, 119-124.
2. D. R. Mortensen, G. T. Seidler, J. J. Kas, N. Govind, C. P. Schwartz, S. Pemmaraju and D. G. Prendergast, *Phys. Rev. B.*, 2017, **96**, 125136.
3. R. A. Valenza, E. P. Jahrman, J. J. Kas and G. T. Seidler, *Phys. Rev. A.*, 2017, **96**, 032504.
